CORRECTION

# Correction: Effect of early dietary energy restriction and phosphorus level on subsequent growth performance, intestinal phosphate transport, and AMPK activity in young broilers

The PLOS ONE Staff

The authors are listed out of order. Please view the correct author order, affiliations, and citation here:

Zhiqiang Miao<sup>1</sup>, Guixian Zhang<sup>1</sup>, Junzhen Zhang<sup>1</sup>, Yu Yang<sup>1</sup>, Jianhui Li<sup>1</sup>

<sup>1</sup> College of Animal Science and Veterinary Medicine, Shanxi Agricultural University, Shanxi, China

Miao Z, Zhang G, Zhang J, Yang Y, Li J (2017) Effect of early dietary energy restriction and phosphorus level on subsequent growth performance, intestinal phosphate transport, and AMPK activity in young broilers. PLoS ONE 12(12): e0186828. <https://doi.org/10.1371/journal.pone.0186828>

The corresponding authors are associated with the following email addresses:

Jianhui Li: [jianhui19840717@163.com](mailto:jianhui19840717@163.com)

Yu Yang: [sxauywd@126.com](mailto:sxauywd@126.com)

The publisher apologizes for this error.

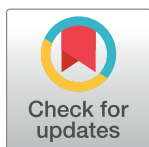

## Reference

1. Miao Z, Zhang G, Zhang J, Li J, Yang Y (2017) Effect of early dietary energy restriction and phosphorus level on subsequent growth performance, intestinal phosphate transport, and AMPK activity in young broilers. PLoS ONE 12(12): e0186828. <https://doi.org/10.1371/journal.pone.0186828> PMID: 29240752

## OPEN ACCESS

**Citation:** The PLOS ONE Staff (2018) Correction: Effect of early dietary energy restriction and phosphorus level on subsequent growth performance, intestinal phosphate transport, and AMPK activity in young broilers. PLoS ONE 13(2): e0192793. <https://doi.org/10.1371/journal.pone.0192793>

**Published:** February 7, 2018

**Copyright:** © 2018 The PLOS ONE Staff. This is an open access article distributed under the terms of the [Creative Commons Attribution License](https://creativecommons.org/licenses/by/4.0/), which permits unrestricted use, distribution, and reproduction in any medium, provided the original author and source are credited.
